# Supplementary material for: The Potential of the HeartLogicTM Algorithm in Patients with a Left Ventricular Assist Device, an Initial Report
Source: MDPI journal article supplement (doi:10.3390/jcdd11020051), 2024-02-01
Supplement: s1 [file s1]

**Supplementary table S1.***Parameters suggestive of congestion*

| Parameters suggestive of congestion                     |  |
|---------------------------------------------------------|--|
| Shortness of breath last night                          |  |
| Shortness of breath during the past 24 hours            |  |
| Edema in the legs or abdomen                            |  |
| Shortness of breath when lying down                     |  |
| Feeling unwell during the past 24 hours                 |  |
| Increased liquid oral intake during the past 24 hours   |  |
| Excessive salt intake during the past 24 hours          |  |
| Reduced exercise intolerance                            |  |
| Fatigue or tiredness during the past 24 hours           |  |
| Nocturnal cough                                         |  |
| Decreased intake during past 24 hours/ loss of appetite |  |
| Dizziness or lightheadedness                            |  |
